# Supplementary material
Source: publisher figshare collection journal article supplement (https://karger.figshare.com/ndownloader/files/27358364)
Supplement: Supplementary file 1 [file 27358364]

**SUPPLEMENTARY INFORMATION**

**TITLE: Intrapleural Fibrinolytics and Deoxyribonuclease for Treatment of Indwelling Pleural Catheter-Related Pleural Infection: a multi-center observational study**

Deirdre B Fitzgerald, MB BCh BAO1,2,3 , Sanjeevan Muruganandan, MBBS1,3,4 , Selina Tsim, PhD5, 6, Hugh Ip, MBBS7, Rachelle Asciak, MD8, Steven Walker, MBChB9, Juan-Pablo Uribe-Becerra, MD10, Adnan Majid, MD FCCP10, Liju Ahmed, FRCP7, Najib M Rahman, DPhil8, Nick A Maskell, DM9, Kevin G Blyth, MBBS5. 6, Y C Gary Lee, PhD1,2,3

**Affiliations:** 1. Sir Charles Gairdner Hospital, WA; 2. Institute for Respiratory Health, WA; 3. University of Western Australia, WA; 4. Northern Hospital, Epping, VIC;5. Queen Elizabeth University Hospital, Glasgow, UK; 6. Institute of Cancer Sciences, University of Glasgow, UK; 7. Guy’s and St. Thomas’ Hospital, London. 8. Oxford University Hospitals NHS Foundation Trust, Oxford; 9. Academic Respiratory Unit, School of Clinical Sciences, University of Bristol, Bristol; 10. Beth Israel Deaconess Medical Centre, Harvard Medical School, Boston, MA.

Table S1: Period of audit and ethical approval for each site.

|  | | |  |
| --- | --- | --- | --- |
| Hospital | HREC and No. | Data Period | No. of patients |
| Sir Charles Gairdner Hospital | SCGH HREC  No: 2012-214 | 06/2010 – 09/2019 | 27 |
| Queen Elizabeth University Hospital | NHS Scotland Caldicott, Waiver | 09/2015 – 04/2017 | 5 |
| Southmead Hospital, Bristol | Frenchay Rec,  Waiver | 05/2016 – 02/2018 | 3 |
| Guy’s and St. Thomas’ Hospital | Guy’s and St. Thomas’ R&D Department, Waiver | 01/2017 – 01/2018 | 2 |
| Oxford University Hospitals Trust | Clinical Trials & Research Governance (CTRG), University of Oxford, Waiver | 01/2009 – 01/2018 | 2 |

The five participating centers are listed. The period during which tPA/DNase treated patients were included from each center varied based on availability of database. This study qualified for a waiver of ethical approval at all UK sites.
